# Supplementary material
Source: PubMed Central journal article supplement (PMC4135657)
Supplement: JB.01838-14_zjb999093272so1.pdf [file JB.01838-14_zjb999093272so1.pdf]

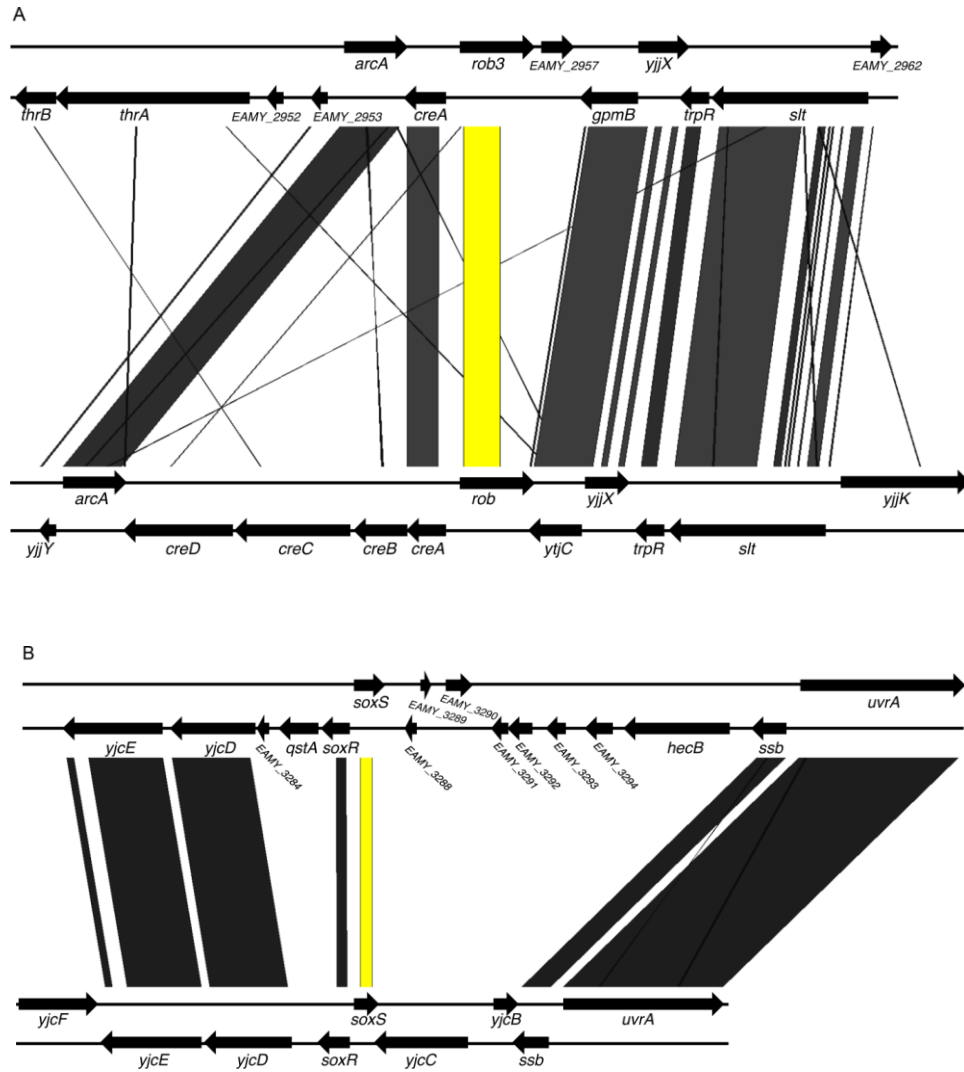

**Supplementary Figure 1.** Modified view of the genomic organization of the (A) *rob* locus from *E. coli* MG1655 and *E. amylovora* CFBP1430 and (B) *soxS* locus from *E. coli* MG1655 and *E. amylovora* CFBP1430 visualized by the Artemis Comparison Tool (91). The dark areas indicate homologous regions with a minimum identity cutoff score of 50% and a maximum identity cutoff score of 89%. Highlighted in yellow are the homologous areas between *rob* and *soxS*, respectively. The alignment was performed using the nucleotide search BLASTN from NCBI.

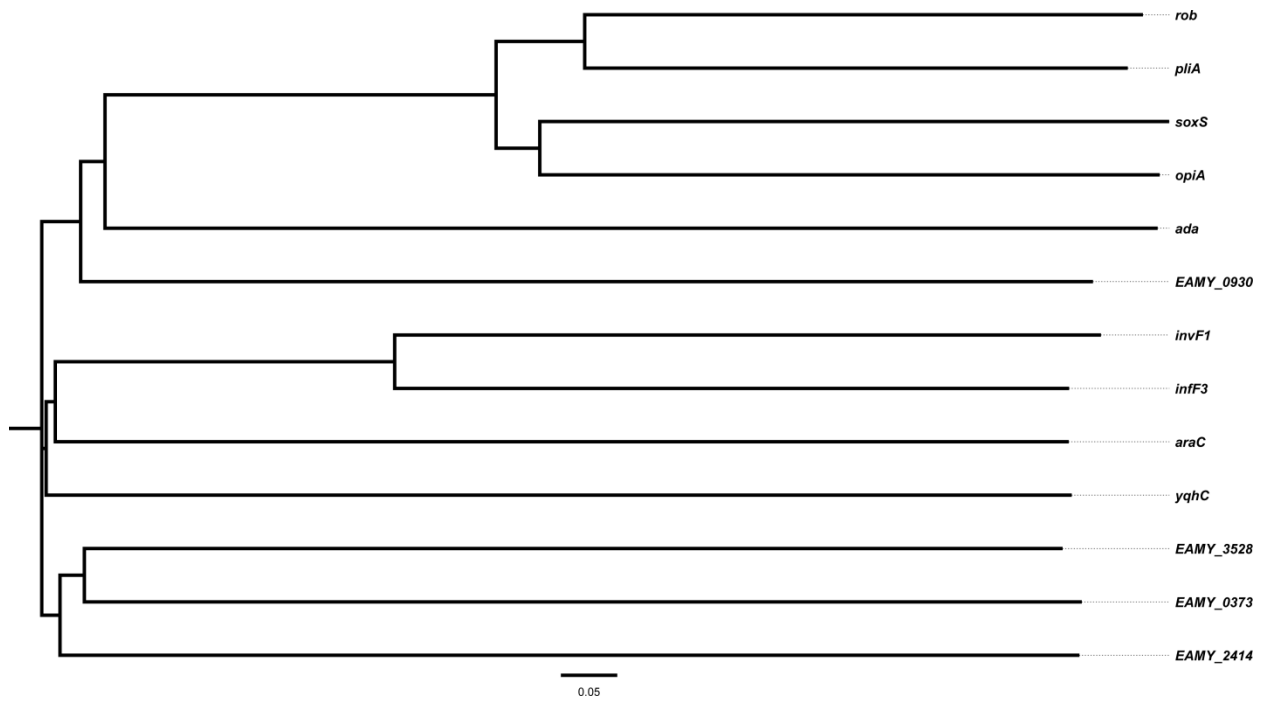

**Supplementary Figure 2.** Phylogenetic tree of AraC/XyIS family members from the fire blight pathogen *E. amylovora*. Multiple sequence alignment was performed using ClustalO (92) and the result was visualized by FigTree (93).

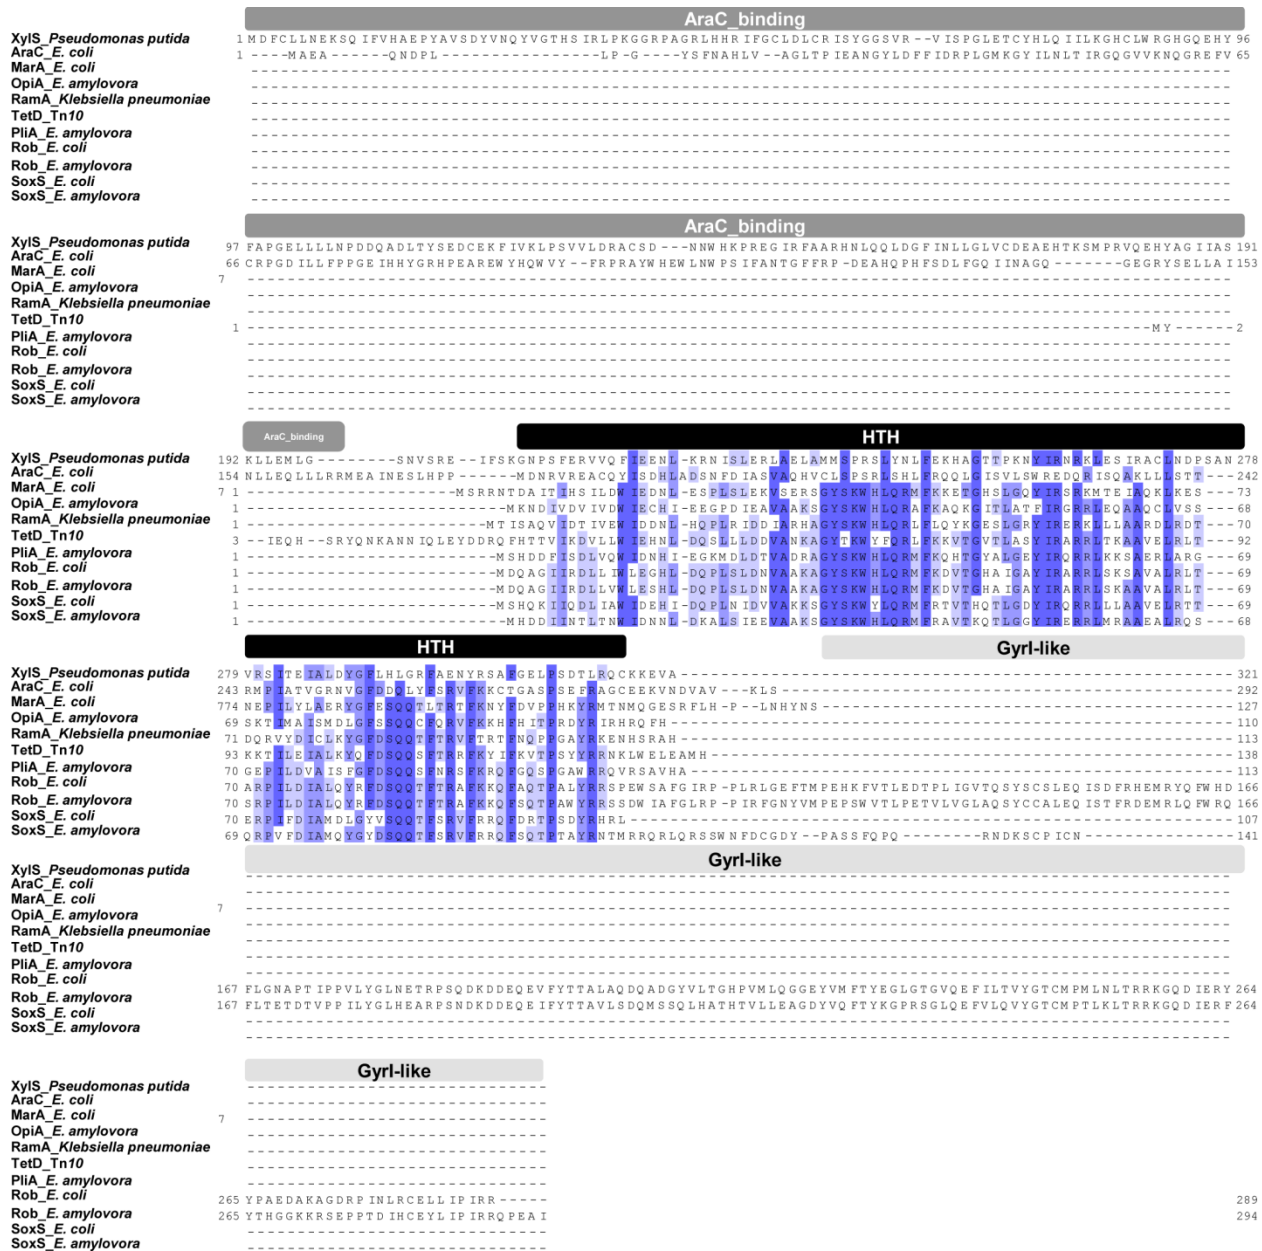

**Supplementary Figure 3.** Multiple sequence alignment (MSA) of the amino acid sequences of members of the AraC/XylS family of transcriptional regulators. The MSA is based on following proteins: XylS from *Pseudomonas putida* (P07859), AraC from *E. coli* (P0A9E1), MarA from *E. coli* (P0ACH6.2), RamA from *Klebsiella pneumoniae* (Q48413), TetD from transposon Tn10 (P28816), Rob from *E. coli* (P0AC1.1), SoxS from *E. coli* (P0A9E4.2), PliA from *E. amylovora* (YP\_003531153.1), Rob from *E. amylovora* (YP\_003532311.1), SoxS from *E. amylovora* (YP\_003532640.1) and OpiA from *E. amylovora* (YP\_003532913.1). Computational analysis was performed using ClustalO (92). Data presentation was done with Jalview (94). Additionally, the AraC binding domain (dark gray bar) in conjunction with the helix-turn-helix (HTH) DNA-binding domain (black bar) as well as the Rob-specific Gyrl-like binding domain (light gray) were determined using Pfam (95) and manually added to the graph. Conserved amino acid residues are shown in blue.

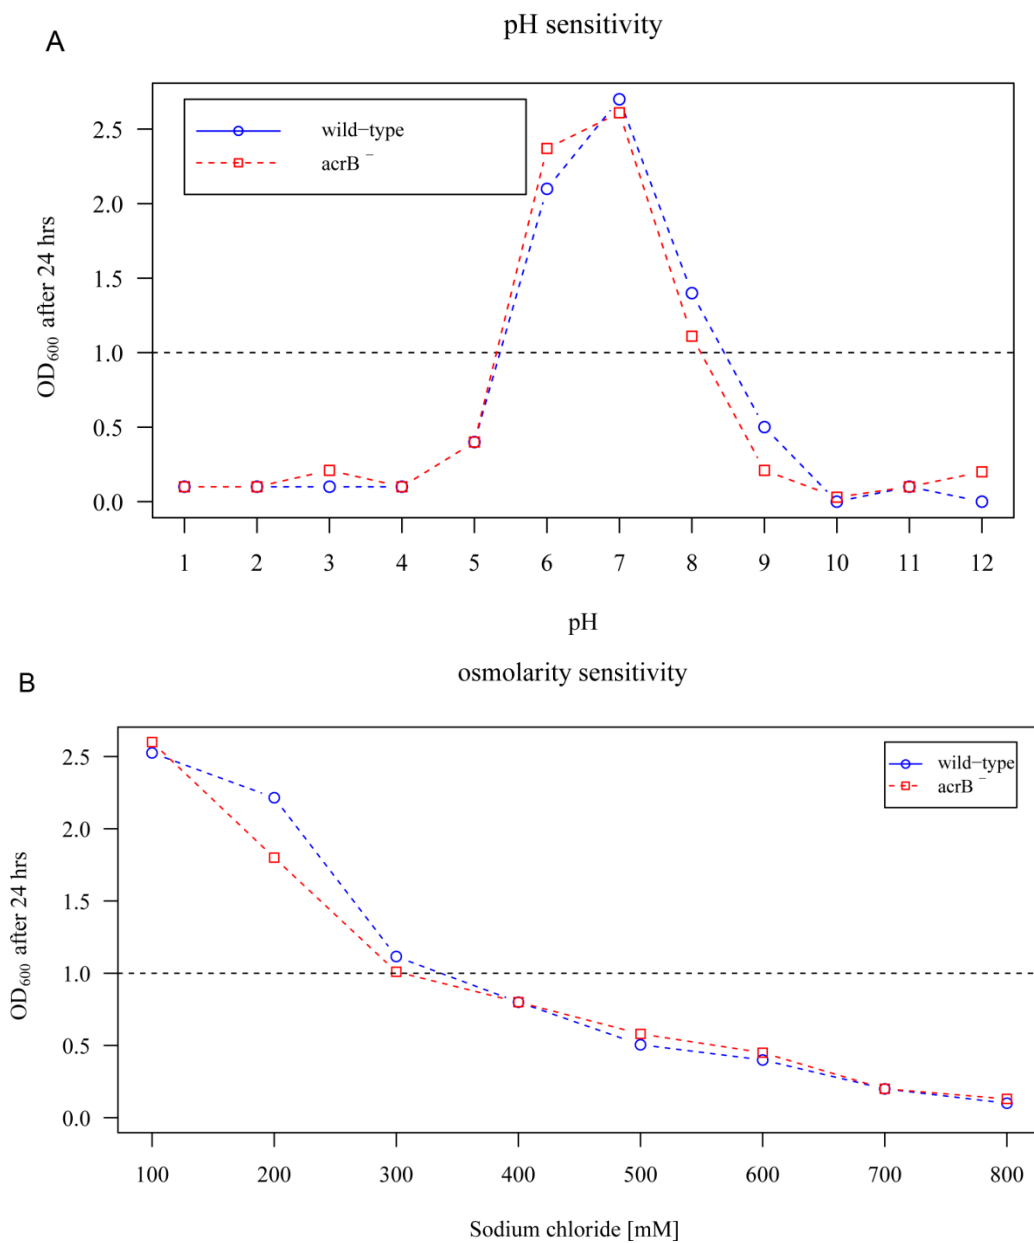

**Supplementary Figure 4.** Effect of pH (A) and salt concentrations (B) on growth of *E. amylovora* Ea1189 (blue line) and of the *acrB*-deficient mutant Ea1189 3 (red line) in AMM2 medium.

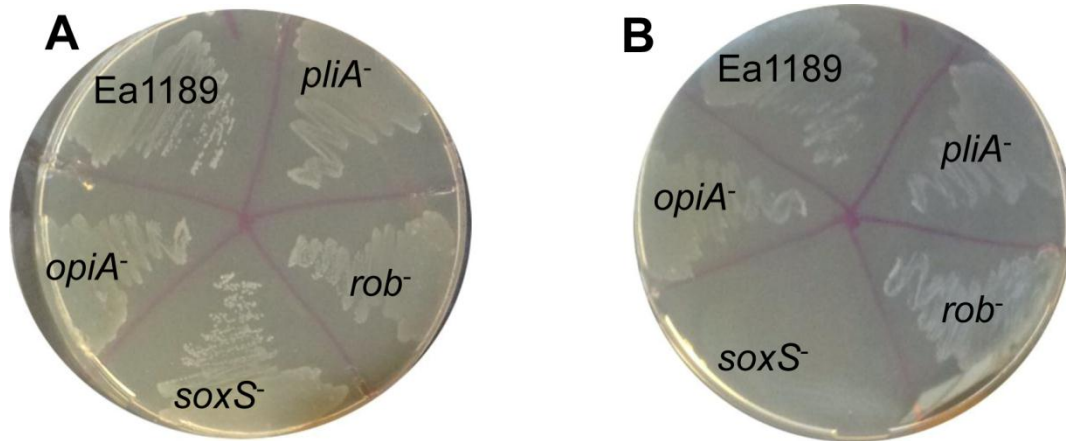

**Supplementary Figure 5.** Paraquat resistance of *E. amylovora* Ea1189 wild-type, *pliA*<sup>-</sup>, *rob*<sup>-</sup>, *soxS*<sup>-</sup> and *opiA*<sup>-</sup> deficient mutants, respectively, on MHB II agar plates without paraquat (A) and with 10 µg/ml paraquat (B). Plates were analyzed for growth after 2 days of incubation at 28°C.

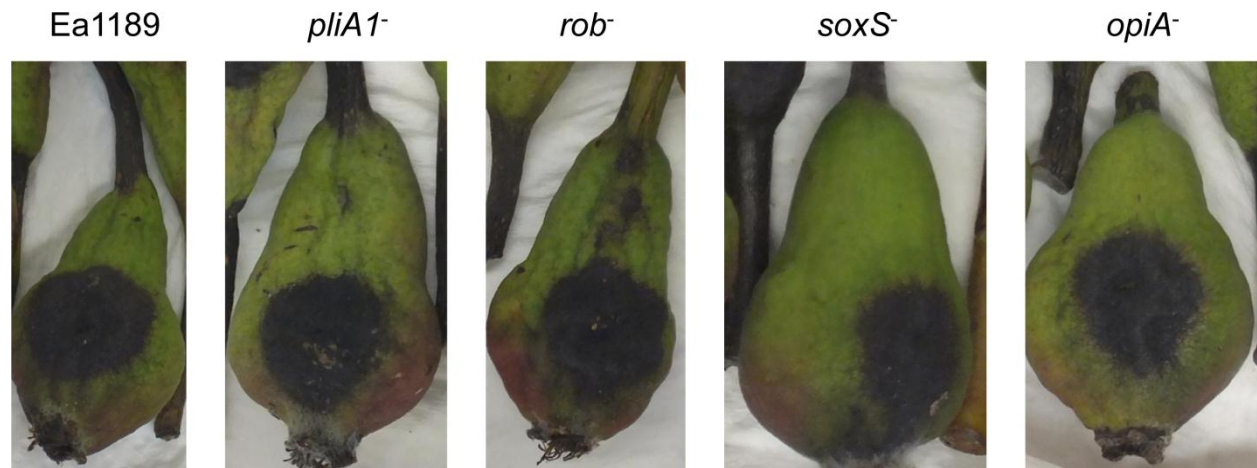

**Supplementary Figure 6.** Disease symptoms developed on immature pear fruits inoculated with *E. amylovora* Ea1189 and corresponding *pliA*-, *rob*-, *soxS*- and *opiA*-deficient mutants, respectively, two weeks after incubation at 18°C. Pictures represent one out of ten pear fruits per infection.

**Supplementary Table 1** Plasmids used in this study

| Plasmid              | Relevant characteristics <sup>a</sup>                                                                                                                                                                                         | Reference or source |
|----------------------|-------------------------------------------------------------------------------------------------------------------------------------------------------------------------------------------------------------------------------|---------------------|
| pBlueScript II SK(+) | Ap <sup>r</sup> , ColE1 origin                                                                                                                                                                                                | Stratagene          |
| pBlueScript II KS(+) | Ap <sup>r</sup> , ColE1 origin                                                                                                                                                                                                | Stratagene          |
| pBBR1MCS             | Cm <sup>r</sup> , ColE1 origin                                                                                                                                                                                                | (46)                |
| pCAM-MCS             | Ap <sup>r</sup> , pCAM140-derivative without mini-Tn5, contains the MCS of pBluescript II SK (+)                                                                                                                              | (8)                 |
| pFCm1                | Ap <sup>r</sup> , Cm <sup>r</sup> , source of Cm <sup>r</sup> cassette flanked by FRT sequences                                                                                                                               | (96)                |
| pCAM-Km              | Km <sup>r</sup> , variant of the gene replacement vector pCAM-MCS, Ap <sup>r</sup> replaced by Km <sup>r</sup>                                                                                                                | This study          |
| pCAM-Km.pliA-ko.Cm   | Km <sup>r</sup> , Cm <sup>r</sup> , contains a 1-kb fragment of <i>pliA</i> from <i>E. amylovora</i> Ea1189, insertion of 1.1-kb Cm-FRT cassette from pFCm1 in <i>Pst</i> I site                                              | This study          |
| pCAM-Km.rob-ko.Cm    | Km <sup>r</sup> , Cm <sup>r</sup> , contains a 1.1-kb fragment of <i>rob</i> from <i>E. amylovora</i> Ea1189, insertion of 1.1-kb Cm-FRT cassette from pFCm1 in blunt-ended <i>Aat</i> II site                                | This study          |
| pCAM-Km.soxS-ko.Cm   | Km <sup>r</sup> , Cm <sup>r</sup> , contains a 1.3-kb fragment of <i>soxS</i> from <i>E. amylovora</i> Ea1189, insertion of 1.1-kb Cm-FRT cassette from pFCm1 in <i>Eco</i> RV site                                           | This study          |
| pCAM-Km.opiA-ko.Cm   | Km <sup>r</sup> , Cm <sup>r</sup> , contains a 2-kb fusion fragment of the 5' and 3' region of <i>opiA</i> from <i>E. amylovora</i> Ea1189, insertion of 1.1-kb Cm-FRT cassette from pFCm1 in <i>Kpn</i> I site of the fusion | This study          |
| pBlueSK.pliA         | Ap <sup>r</sup> , contains a 594-bp fragment carrying <i>pliA</i> of <i>E. amylovora</i> Ea1189 including the upstream promoter region                                                                                        | This study          |
| pBlueKS.pliA         | Ap <sup>r</sup> , contains a 353-bp fragment carrying <i>pliA</i> of <i>E. amylovora</i> Ea1189                                                                                                                               | This study          |
| pBlueSK.rob          | Ap <sup>r</sup> , contains a 1160-bp fragment carrying <i>rob</i> of <i>E. amylovora</i> Ea1189 including the upstream promoter region                                                                                        | This study          |
| pBlueKS.rob          | Ap <sup>r</sup> , contains a 896-bp fragment carrying <i>rob</i> of <i>E. amylovora</i> Ea1189                                                                                                                                | This study          |
| pBlueSK.soxS         | Ap <sup>r</sup> , contains a 606-bp fragment carrying <i>soxS</i> of <i>E. amylovora</i> Ea1189 including the upstream promoter region                                                                                        | This study          |
| pBlueKS.soxS         | Ap <sup>r</sup> , contains a 448-bp fragment carrying <i>soxS</i> of <i>E. amylovora</i> Ea1189                                                                                                                               | This study          |
| pBlueSK.opiA         | Ap <sup>r</sup> , contains a 720-bp fragment carrying <i>opiA</i> of <i>E. amylovora</i> Ea1189 including the upstream promoter region                                                                                        | This study          |
| pBlueKS.opiA         | Ap <sup>r</sup> , contains a 343-bp fragment carrying <i>opiA</i> of <i>E. amylovora</i> Ea1189                                                                                                                               | This study          |
| pBBR.egfp.TIR        | Cm <sup>r</sup> , contains the TIR- <i>egfp</i> -T <sub>0</sub> cassette in pBBR1MCS in opposite orientation with respect to <i>lac</i> promoter                                                                              | (8)                 |
| pBBR.acrA-Pro.egfp   | Cm <sup>r</sup> , contains a 133-bp fragment carrying the promoter region of <i>acrA</i> , transcriptional fusion of <i>acrA</i> with <i>egfp</i>                                                                             | (45)                |
| pET-28a(+)           | Km <sup>r</sup> , ColE1 origin, expression vector with T7lac promoter, N- and C-terminal His tag                                                                                                                              | Novagen             |
| pET28a.acrR          | Km <sup>r</sup> , contains a 0.6-kb fragment carrying <i>acrR</i> of <i>E. amylovora</i> Ea1189, C-terminal translational fusion with His-tag                                                                                 | This study          |
| pET28a.rob           | Km <sup>r</sup> , contains a 0.9-kb fragment carrying <i>rob</i> of <i>E. amylovora</i> Ea1189, C-terminal translational fusion with His-tag                                                                                  | This study          |

<sup>a</sup> Antibiotic resistance: Ap<sup>r</sup>, ampicillin; Cm<sup>r</sup>, chloramphenicol; Km<sup>r</sup>, kanamycin.

Supplementary Table 2 Primers used in this study

| Primer                                                    | Sequence (5' - 3')                    | Characteristic(s)                                                                        |
|-----------------------------------------------------------|---------------------------------------|------------------------------------------------------------------------------------------|
| <b><i>pliA, rob, soxS, opiA</i> knockout</b>              |                                       |                                                                                          |
| <i>pliA_ko_fwd</i>                                        | TTCTTCAGCACGGCTCCG                    | used to clone <i>pliA</i> knockout vector                                                |
| <i>pliA_ko_rev</i>                                        | ACTGCGTTGAAGTGGCGC                    | used to clone <i>pliA</i> knockout vector                                                |
| <i>rob_ko_fwd</i>                                         | TCTTCAGCCAGTCCCAGC                    | used to clone <i>rob</i> knockout vector                                                 |
| <i>rob_ko_rev</i>                                         | TTCCAGCAGCACCGTGTG                    | used to clone <i>rob</i> knockout vector                                                 |
| <i>soxS_ko_fwd</i>                                        | TTCATCAGCCACTGCTG                     | used to clone <i>soxS</i> knockout vector                                                |
| <i>soxS_ko_rev</i>                                        | AGCAATCACACCTGAGC                     | used to clone <i>soxS</i> knockout vector                                                |
| <i>opiA-A5-1</i>                                          | TTCCACGGTTGGGTGGC                     | used to clone <i>opiA</i> knockout vector                                                |
| <i>opiA-A6 (rev)</i>                                      | CCCTATAGTGAGTCGGTACCTGAACGGCACTGCTGGT | used to clone <i>opiA</i> knockout vector                                                |
| <i>opiA-B3 (fwd)</i>                                      | GGTACCGACTACTATAGGGCACCCGATTTCACTG    | used to clone <i>opiA</i> knockout vector                                                |
| <i>opiA-B4</i>                                            | ATAGCGCTGATGATGCG                     | used to clone <i>opiA</i> knockout vector                                                |
| <b><i>pliA, rob, soxS, opiA</i> knockout verification</b> |                                       |                                                                                          |
| <i>pliA_out1 (fwd)</i>                                    | AGTGCTAATGCTGCTGG                     | Primer flanking <i>pliA</i> knockout fragment (used to confirm insertion of Cm cassette) |
| <i>pliA_out2 (rev)</i>                                    | AACGATGTGCCAACGGTG                    | Primer flanking <i>pliA</i> knockout fragment (used to confirm insertion of Cm cassette) |
| <i>rob_out1 (fwd)</i>                                     | GACCAACTGTGACAGG                      | Primer flanking <i>rob</i> knockout fragment (used to confirm insertion of Cm cassette)  |
| <i>rob_out2 (rev)</i>                                     | ATATCCTGCCCTTACGC                     | Primer flanking <i>rob</i> knockout fragment (used to confirm insertion of Cm cassette)  |
| <i>soxS_out1 (fwd)</i>                                    | TTCGCTCAGGCGTCCATC                    | Primer flanking <i>soxS</i> knockout fragment (used to confirm insertion of Cm cassette) |
| <i>soxS_out2 (rev)</i>                                    | ACGCCCTGGTTTGACCTG                    | Primer flanking <i>soxS</i> knockout fragment (used to confirm insertion of Cm cassette) |
| <i>opiA_out1 (fwd)</i>                                    | ACCTCATCAATGCCAGC                     | Primer flanking <i>opiA</i> knockout fragment (used to confirm insertion of Cm cassette) |
| <i>opiA_out8 (rev)</i>                                    | TATGCCGAACTGCCAGCG                    | Primer flanking <i>opiA</i> knockout fragment (used to confirm insertion of Cm cassette) |
| <i>cat_out2</i>                                           | CTTACGTGCCGATCAACG                    | reverse primer used to confirm insertion of Cm cassette                                  |
| <i>cat_out3</i>                                           | AGCATTATCAGGCGGGC                     | reverse primer used to confirm insertion of Cm cassette                                  |
| <i>cat_out4</i>                                           | ACAAGGTGCTGATGCCGC                    | forward primer used to confirm insertion of Cm cassette                                  |
| <i>cat_out5</i>                                           | GTGATGGCTCCATGTCG                     | forward primer used to confirm insertion of Cm cassette                                  |
| <b><i>pliA, rob, soxS, opiA</i> overexpression</b>        |                                       |                                                                                          |
| <i>pliA-P-fwd-KpnI</i>                                    | TATGGTACCATGGCTTCTCCCTGTTTTCCG        | used to clone <i>pliA</i> overexpression vector                                          |
| <i>pliA_fwd_KpnI</i>                                      | ACCGATGAGTCATGATGAT                   |                                                                                          |
| <i>pliA_rev_BamHI</i>                                     | GTGCATGCCTGAAATCTGG                   | used to clone <i>pliA</i> overexpression vector                                          |
| <i>rob-P-fwd-ApaI</i>                                     | ATAGGGCCCTGCAACGCCGAGAGCAAAA          | used to clone <i>rob</i> overexpression vector                                           |
| <i>rob_fwd_KpnI</i>                                       | TATGGACCAAGCCGTATC                    |                                                                                          |
| <i>rob_rev_SacII</i>                                      | GCAATCTGATAGCACCCGC                   | used to clone <i>rob</i> overexpression vector                                           |
| <i>soxS-P-fwd-KpnI</i>                                    | TATGGTACCGCCACATACCAGGAGTC            | used to clone <i>soxS</i> overexpression vector                                          |
| <i>soxS_fwd_KpnI</i>                                      | TATGCATGACGACATCATC                   |                                                                                          |
| <i>soxS_rev_BamHI</i>                                     | GCCCCGTGCGGGGATCCGCA                  | used to clone <i>soxS</i> overexpression vector                                          |
| <i>opiA-P-fwd-ApaI</i>                                    | ATAGGGCCCTTACGGCTGCGTTAAACAG          | used to clone <i>opiA</i> overexpression vector                                          |
| <i>opiA_fwd_KpnI</i>                                      | GACAATGTCGTTTTTCATT                   |                                                                                          |
| <i>opiA_rev_BamHI</i>                                     | CCGGCTAACTCAGTAAACTG                  | used to clone <i>opiA</i> overexpression vector                                          |
| <b>Electrophoretic mobility shift assay</b>               |                                       |                                                                                          |
| <i>acrA-P-fwd2</i>                                        | TGTTTTGGTATTTCTGTGCC                  | used to amplify <i>acrAB</i> promoter region                                             |
| <i>acrA-P-rev2-Cy5</i>                                    | CTGAAAGCATCAGAACGG                    | used to amplify <i>acrAB</i> promoter region, Cy5 labeled                                |
| <i>acrR-NcoI</i>                                          | ATACCATGGCACGAAATACCAACAAC            | used to clone <i>acrR</i> into C-terminal His-tag protein expression vector              |
| <i>acrR-EcoRI</i>                                         | TAAGAATTGCGGGCCGGTTTGCACAAGGTTACG     | used to clone <i>acrR</i> into C-terminal His-tag protein expression vector              |
| <b>Quantitative RT-PCR</b>                                |                                       |                                                                                          |
| <i>pliA_RT_fwd</i>                                        | AAGCGATCTTGTGAGTGG                    |                                                                                          |
| <i>pliA_RT_rev</i>                                        | GAATGTATTGCCCCAGTGC                   |                                                                                          |
| <i>rob_RT_fwd</i>                                         | CACTTGATAACGTCGCAGC                   |                                                                                          |
| <i>rob_RT_rev</i>                                         | AACGTAAGCCACTGCTGC                    |                                                                                          |
| <i>soxS_RT_fwd</i>                                        | CAACACCCTGACCAACTGG                   |                                                                                          |
| <i>soxS_RT_rev</i>                                        | GCATTAACGGCGTTCCCG                    |                                                                                          |
| <i>opiA_RT_fwd</i>                                        | CGATGTCATCGTAGACTGG                   |                                                                                          |
| <i>opiA_RT_rev</i>                                        | AAAGGTCGCCAGAGTGATG                   |                                                                                          |
| <i>recA_RT_fwd</i>                                        | TAAGGGCTCCATCATGCGC                   |                                                                                          |
| <i>recA_RT_rev</i>                                        | ACCTGCAAAGTCAGGGTGG                   |                                                                                          |



**Supplementary Table 3** BLASTP results for PliA, Rob, SoxS and OpiA homologues from *E. amylovora* Ea1189 and *E. coli* MG1655 (Ec)<sup>a,b</sup>

|                |             | <b>PliA</b> | <b>Rob</b> | <b>SoxS</b> | <b>OpiA</b> |
|----------------|-------------|-------------|------------|-------------|-------------|
|                | Length (aa) |             |            |             |             |
| <b>PliA</b>    | 113         | 100%        | 53%        | 50%         | 43%         |
| <b>Rob</b>     | 294         | 53%         | 100%       | 59%         | 47%         |
| <b>SoxS</b>    | 141         | 50%         | 59%        | 100%        | 48%         |
| <b>OpiA</b>    | 110         | 43%         | 47%        | 48%         | 100%        |
| <b>MarA Ec</b> | 127         | 46%         | 49%        | 46%         | 42%         |
| <b>Rob Ec</b>  | 289         | 54%         | <b>72%</b> | 57%         | 44%         |
| <b>SoxS Ec</b> | 107         | 50%         | 57%        | <b>64%</b>  | 49%         |

<sup>a</sup> Accession numbers: PliA (YP\_003531153), Rob (YP\_003532311), SoxS (YP\_003532640), OpiA (YP\_003532913), MarA Ec (P0ACH5), Rob Ec (AAA97292), SoxS Ec (AAC77032)

<sup>b</sup> Bold numbers indicate the highest sequence identity values

**Supplementary Table 4** Antimicrobial susceptibility profiles of *E. amylovora* Ea1189 and of the *pliA*<sup>-</sup>, *rob*<sup>-</sup>, *soxS*<sup>-</sup> and *opiA*<sup>-</sup> deficient mutant

| Drug             | MIC (µg/ml) <sup>a</sup> |                                  |                                 |                                  |                                  |
|------------------|--------------------------|----------------------------------|---------------------------------|----------------------------------|----------------------------------|
|                  | Ea1189                   | Ea1189. <i>pliA</i> <sup>-</sup> | Ea1189. <i>rob</i> <sup>-</sup> | Ea1189. <i>soxS</i> <sup>-</sup> | Ea1189. <i>opiA</i> <sup>-</sup> |
| Acriflavine      | 125                      | 125                              | 125                             | 125                              | 125                              |
| Amikacin         | 6.25                     | 6.25                             | 6.25                            | 6.25                             | 6.25                             |
| Azithromycin     | 0.63                     | 0.63                             | 0.63                            | 0.63                             | 0.63                             |
| Bile             | 5000                     | 5000                             | > 5000                          | 5000                             | 5000                             |
| Cadmium acetate  | 50                       | 50                               | 50                              | 50                               | 50                               |
| Cefepime         | 12.5                     | 12.5                             | 12.5                            | 12.5                             | 12.5                             |
| Chloramphenicol  | 3.13                     | > 100                            | > 100                           | > 100                            | > 100                            |
| Clotrimazole     | > 5000                   | > 5000                           | > 5000                          | > 5000                           | > 5000                           |
| Copper sulphate  | 1250                     | 1250                             | 1250                            | 1250                             | 1250                             |
| Crystal violet   | 12.5                     | 12.5                             | 12.5                            | 12.5                             | 12.5                             |
| Daidzein         | > 5000                   | > 5000                           | > 5000                          | > 5000                           | > 5000                           |
| Erythromycin     | 1.25                     | 1.25                             | 1.25                            | 1.25                             | 1.25                             |
| Ethidium Bromide | 500                      | 500                              | 500                             | 500                              | 500                              |
| Fusidic acid     | 250                      | 250                              | 500                             | 250                              | 250                              |
| Genistein        | > 1000                   | > 1000                           | > 1000                          | > 1000                           | > 1000                           |
| Naladixic acid   | 2.5                      | 2.5                              | 2.5                             | 2.5                              | 2.5                              |
| Naringenin       | 1000                     | 1000                             | 1000                            | 1000                             | 1000                             |
| Norfloxacin      | 0.16                     | 0.16                             | 0.16                            | 0.16                             | 0.16                             |
| Novobiocin       | 250                      | 250                              | 250                             | 500                              | 250                              |
| Phloretin        | 5000                     | 5000                             | 5000                            | 5000                             | 5000                             |
| Rhodamine 6G     | 125                      | 125                              | 125                             | 125                              | 125                              |
| Silver nitrate   | 3.13                     | 3.13                             | 3.13                            | 3.13                             | 3.13                             |
| Tannin           | 2500                     | 2500                             | 2500                            | 2500                             | 2500                             |
| Tobramycin       | 1.56                     | 1.56                             | 1.56                            | 1.56                             | 1.56                             |
| Zinc sulphate    | 500                      | 500                              | 500                             | 500                              | 500                              |

<sup>a</sup> MIC values were determined by the 2-fold dilution assay in three or more independent experiments.

**Supplementary Table 5** Virulence assay on apple rootstock MM 106

| Strain                   | Re-isolated bacterial cells <sup>a</sup> |                                       |                                       |
|--------------------------|------------------------------------------|---------------------------------------|---------------------------------------|
|                          | 1 dpi                                    | 3 dpi                                 | 7 dpi                                 |
| Ea1189                   | $3.5 \times 10^7 \pm 2.5 \times 10^7$    | $9.6 \times 10^7 \pm 6.2 \times 10^6$ | $4.6 \times 10^8 \pm 2.0 \times 10^8$ |
| Ea1189.pliA <sup>-</sup> | $1.6 \times 10^7 \pm 6.3 \times 10^6$    | $8.8 \times 10^7 \pm 6.5 \times 10^7$ | $1.9 \times 10^8 \pm 2.8 \times 10^7$ |
| Ea1189.rob <sup>-</sup>  | $1.3 \times 10^7 \pm 9.9 \times 10^6$    | $1.7 \times 10^8 \pm 1.6 \times 10^8$ | $8.0 \times 10^8 \pm 2.9 \times 10^7$ |
| Ea1189.soxS <sup>-</sup> | $3.6 \times 10^7 \pm 3.3 \times 10^7$    | $1.2 \times 10^8 \pm 9.1 \times 10^6$ | $5.1 \times 10^7 \pm 2.1 \times 10^7$ |
| Ea1189.opiA <sup>-</sup> | $1.8 \times 10^7 \pm 5.4 \times 10^6$    | $8.9 \times 10^7 \pm 6.9 \times 10^7$ | $7.4 \times 10^8 \pm 6.0 \times 10^8$ |

<sup>a</sup> Bacteria were inoculated by prick technique in the shoot tips with an inoculum of  $5 \times 10^6$  CFU/shoot. Establishment of a population of *E. amylovora* Ea1189, *pliA*, *rob*, *soxS* and *opiA* mutant (CFU/shoot) was determined 1, 3 and 7 days post inoculation (dpi), respectively.
